# Supplementary material for: Comparison of Small RNA Profiles of Glycine max and Glycine soja at Early Developmental Stages
Source: MDPI journal article supplement (doi:10.3390/ijms17122043), 2016-12-06
Supplement: s1 [file s1]

# Supplementary Materials: Comparison of Small RNA Profiles of *Glycine max* and *Glycine soja* at Early Developmental Stages

Yuzhe Sun, Zeta Mui, Xuan Liu, Aldrin Kay-Yuen Yim, Hao Qin, Fuk-Ling Wong, Ting-Fung Chan, Siu-Ming Yiu, Hon-Ming Lam and Boon Leong Lim

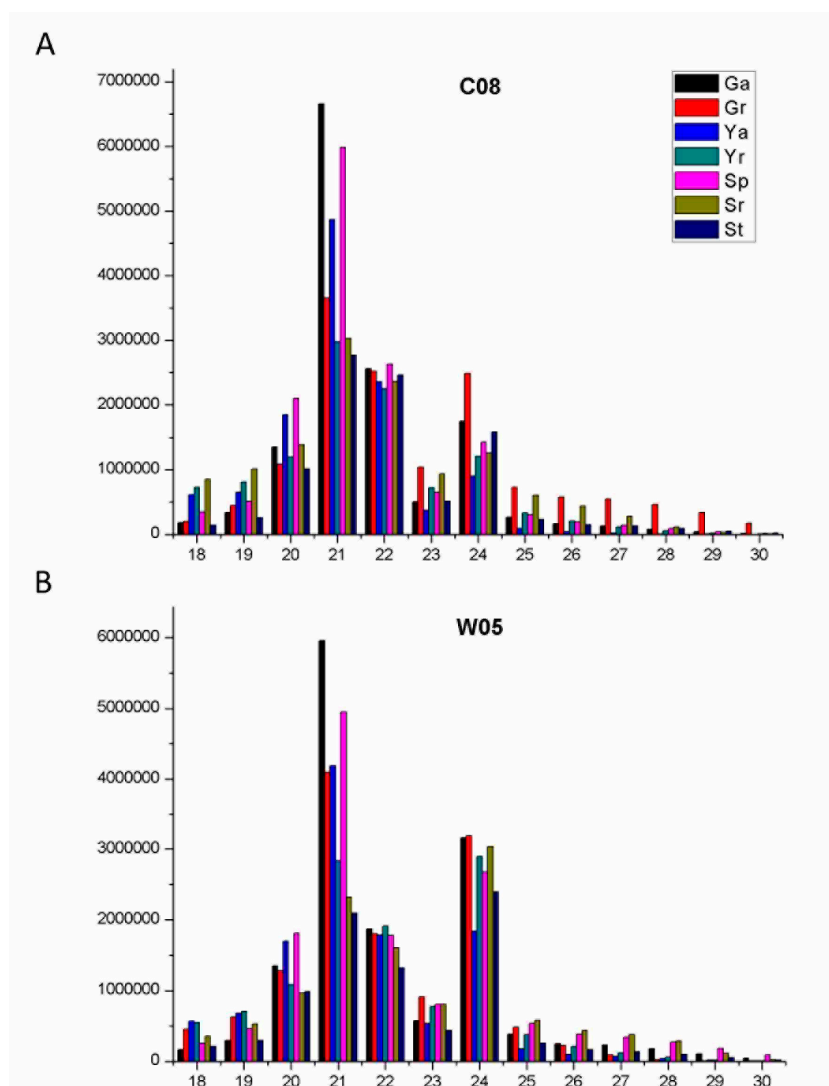

**Figure S1.** Length distributions of sRNA. The sRNAs of 7 samples each of a cultivated soybean accession (C08) and a wild accession (W05) were sequenced. X-axes: Length of reads (nt). Y-axes: Total number of reads. (A) Length distributions of C08 sRNAs; (B) Length distributions of W05 sRNAs. Ga: Germinated seedling cotyledons; Gr: Germinated seedling roots; Ya: Young seedling leaves; Yr: Young seedling roots; Sp: Seedling primary leaves; Sr: Seedling roots; St: Seedling trifoliate.

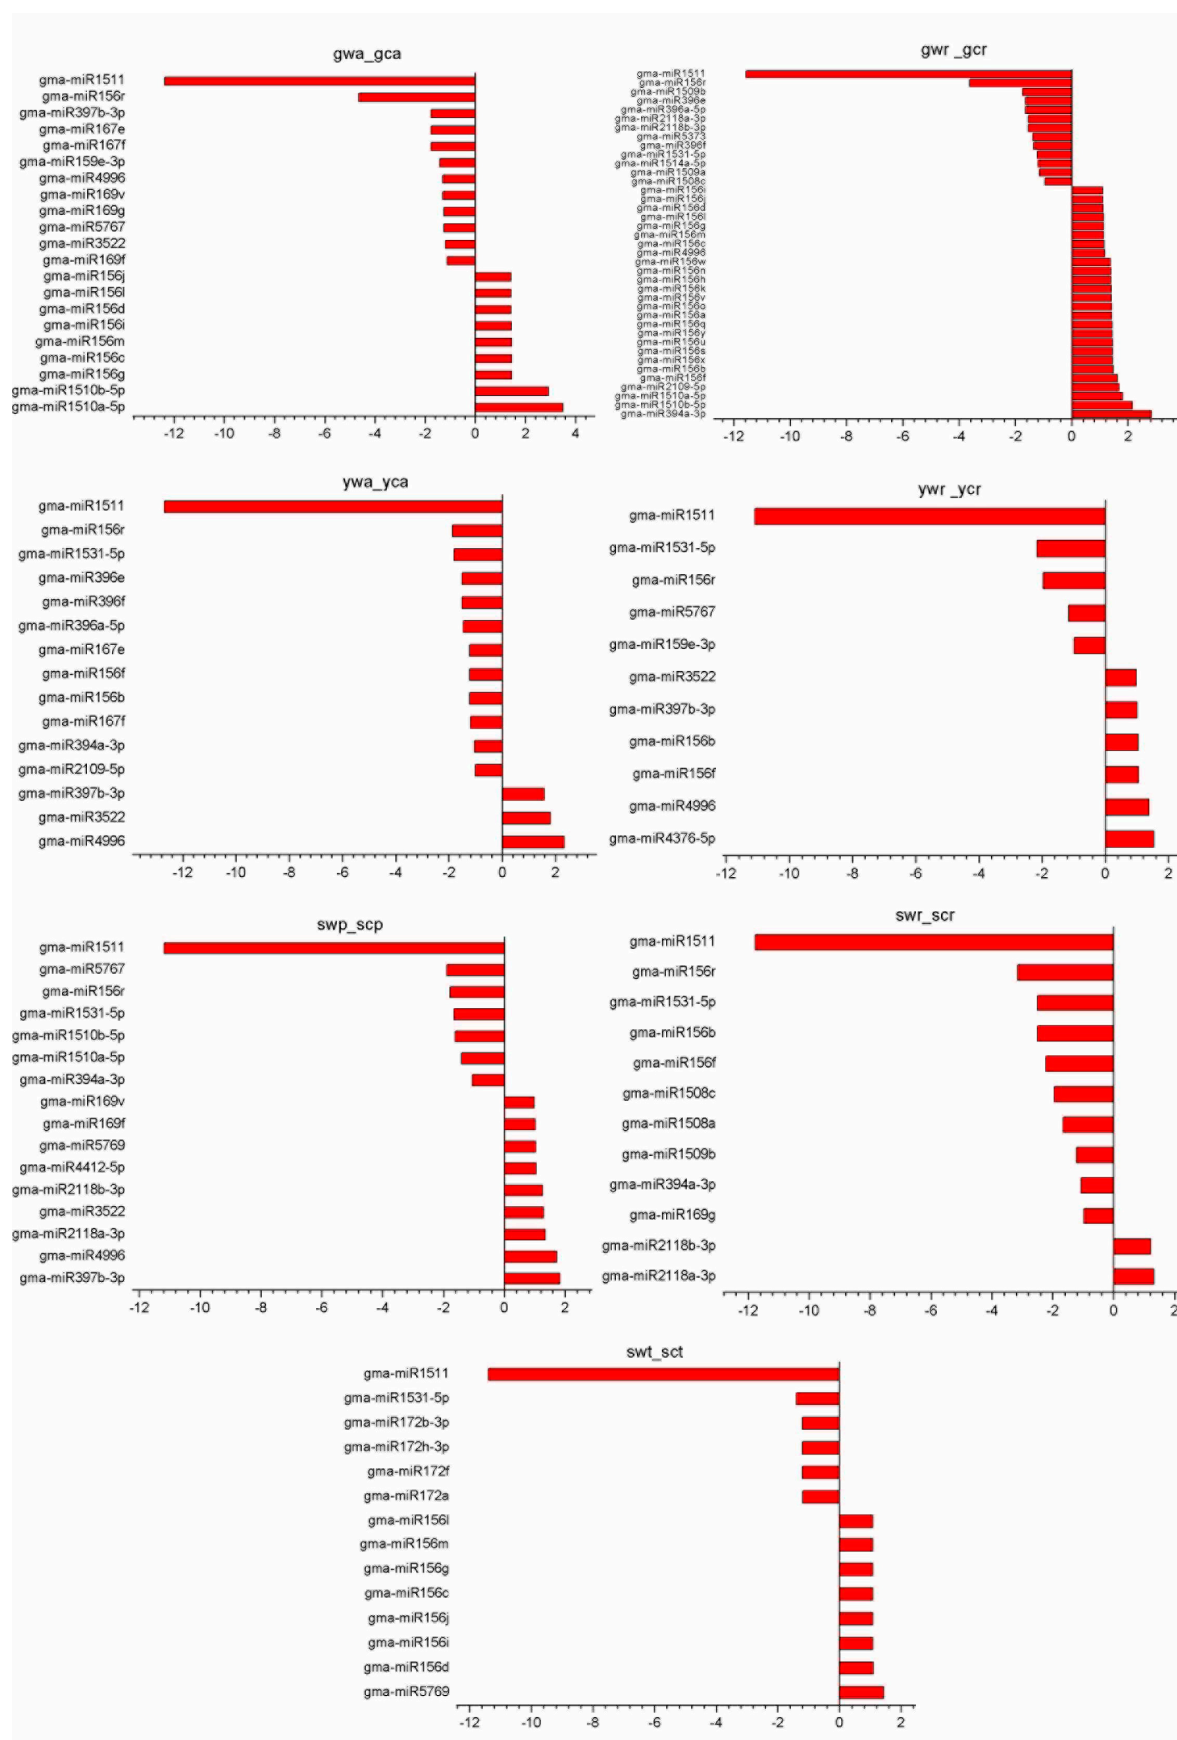

**Figure S2.** Pairwise comparisons of miRNA expressions between corresponding samples of C08 and W05. The same tissues from different accessions were compared (W05 samples/C08 samples). miRNAs of which fold-change  $-1 < \text{Log}_2 < 1$  were removed from the dataset.

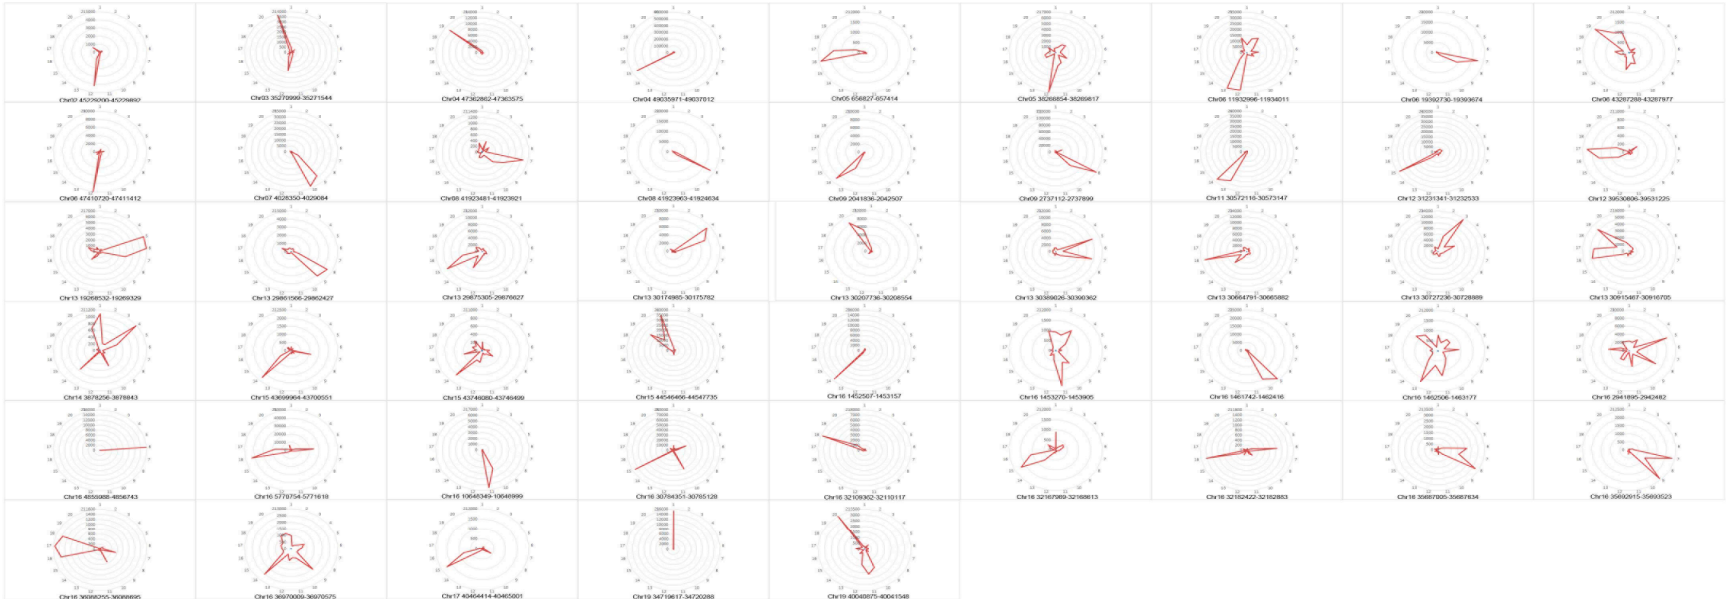

**Figure S3.** Phase check of *PHAS* regions of C08. Twenty-one-nucleotide sRNA reads in each *PHAS* region of C08 were plotted as radar maps. The needles pointed to the start positions of sRNAs. If a needle pointed to more than two directions, the corresponding sRNA in the region was discarded.

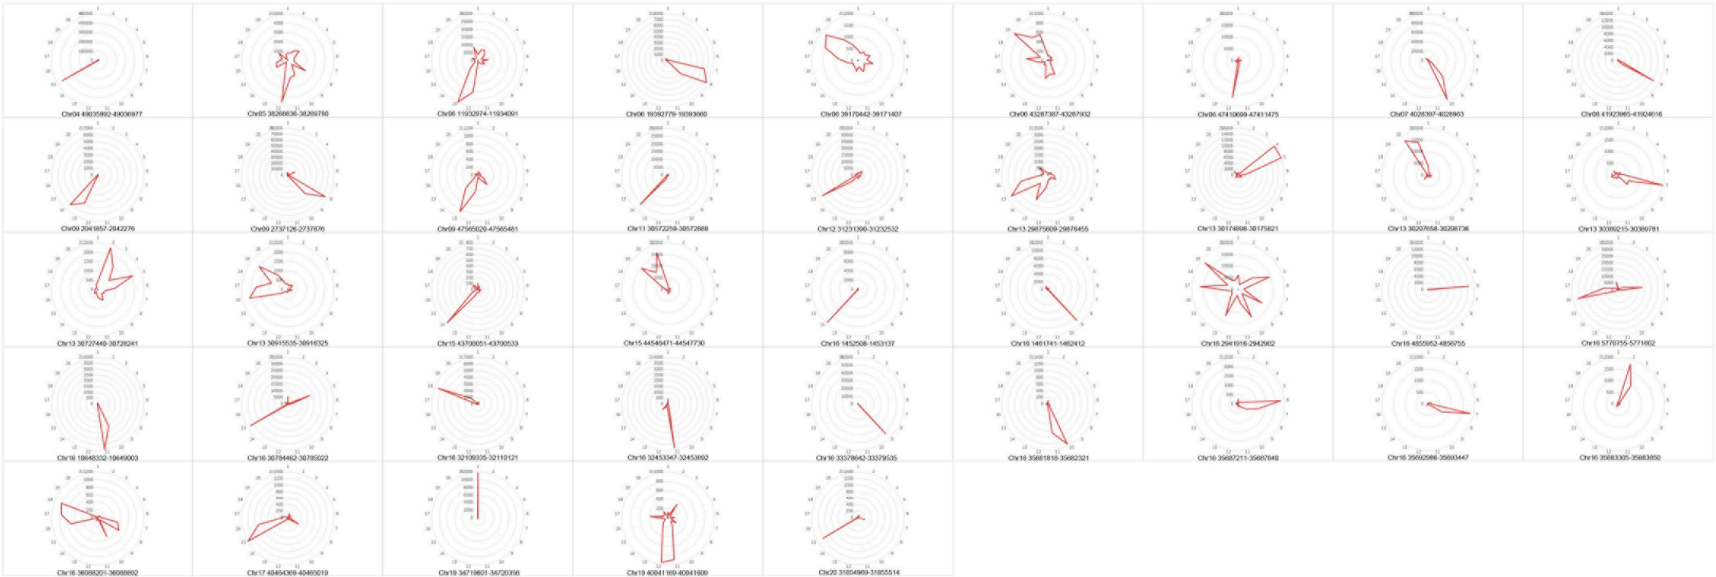

**Figure S4.** Phase check of *PHAS* regions of W05. Twenty-one-nucleotide sRNA reads in each *PHAS* region of C08 were plotted as radar maps. The needles pointed to the start positions of sRNAs. If a needle pointed to more than two directions, the corresponding sRNA in the region was discarded.

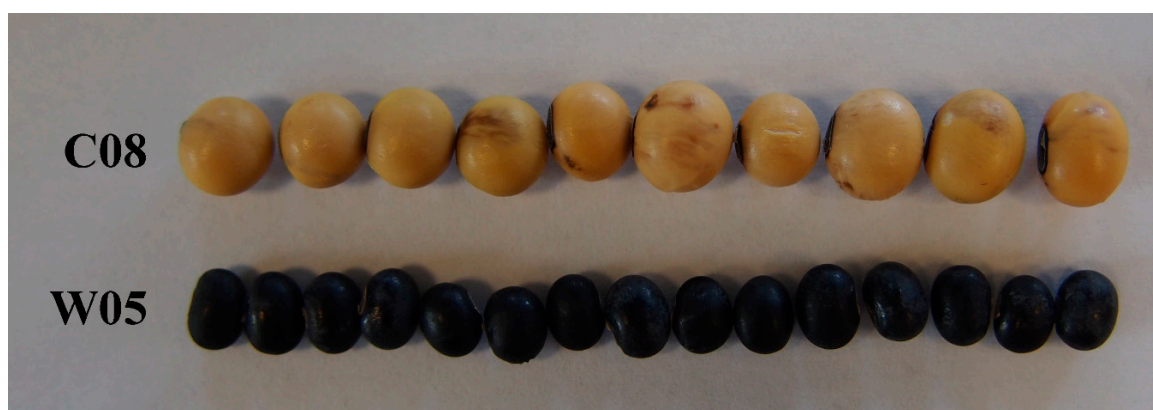

**Figure S5.** Seeds of wild and cultivated soybeans. Black seeds of wild soybeans (W05) are smaller than yellow seeds of cultivated soybeans (C08).
